# Supplementary material for: Epidemiological Trends of Dengue Disease in Brazil (2000–2010): A Systematic Literature Search and Analysis
Source: PLoS Negl Trop Dis. 2013 Dec 19;7(12):e2520. doi: 10.1371/journal.pntd.0002520 (PMC3871634; doi:10.1371/journal.pntd.0002520)
Supplement: Table S3 — Incidence of dengue disease in Brazil: regional data. (PDF) [file pntd.0002520.s004.pdf]

Supplementary Table S3. Incidence of dengue disease in Brazil: regional data.

| Year | Location               | Region       | DF     |                                           | Laboratory-confirmed DF (n) | DF hospitalization (n) | DHF (n)         | DF mortality |                      | Source of data<br>First author, year <sup>Ref</sup> |
|------|------------------------|--------------|--------|-------------------------------------------|-----------------------------|------------------------|-----------------|--------------|----------------------|-----------------------------------------------------|
|      |                        |              | (n)    | Incidence (per 100,000 population)        |                             |                        |                 | (n)          | Population incidence |                                                     |
| 2000 | City of Vitória        | Southeast    | 5679   | 1942.8                                    | 1652                        |                        | 11*             | 3            |                      | Cardoso 2011 [42]                                   |
| 2000 | State of Ceará         | Northeast    | 13,645 |                                           |                             |                        | 4 <sup>†</sup>  |              |                      | Cavalcanti 2011 [39]                                |
| 2000 | State of Pernambuco    | Northeast    | 27,949 |                                           |                             |                        | 38              | -            |                      | Cordeiro 2007 [34]                                  |
| 2000 | City of Itabuna        | Northeast    | 1279   | 650.3                                     |                             |                        |                 |              |                      | De Souza 2010 [40]                                  |
| 2000 | State of São Paulo     | Southeast    |        | 9.74                                      |                             |                        |                 |              |                      | Gasparetti 2007 [46]                                |
| 2000 | City of Glory of Goitá | Northeast    | 133    | 482.68                                    |                             |                        |                 |              |                      | Dos Santos 2003 [28]                                |
| 2000 | City of Goiânia        | Central-West | 6709   |                                           | 203                         |                        |                 |              |                      | Feres 2006 [45]                                     |
| 2000 | City of Ribeirão Preto | Southeast    | 208    | 43.45                                     |                             |                        |                 |              |                      | Hino 2010 [47]                                      |
| 2000 | City of São Luís       | Northeast    | 194    |                                           |                             |                        |                 |              |                      | Goncalves Neto 2004 [35]                            |
| 2000 | Rio de Janeiro         | Southeast    | ~6000  |                                           |                             |                        |                 |              |                      | Nogueira 2002 [6]                                   |
| 2000 | City of Salvador       | Northeast    |        | 1888.5 (Liberdale);<br>1583.2 (Itapagipe) |                             |                        |                 |              |                      | Sampaio 2008 [48]                                   |
| 2000 | State of Piauí         | Northeast    | 7000   |                                           |                             |                        |                 |              |                      | De Castro 2003 [49]                                 |
| 2001 | City of Vitória        | Southeast    | 1837   | 620.6                                     | 357                         |                        | 4*              | 1            |                      | Cardoso 2011 [42]                                   |
| 2001 | State of Ceará         | Northeast    | 34,930 |                                           |                             |                        | 82 <sup>†</sup> |              |                      | Cavalcanti 2011 [39]                                |

| Year | Location                                               | Region                                                     | DF      |                                    | Laboratory-confirmed DF (n) | DF hospitalization (n) | DHF (n)         | DF mortality |                      | Source of data<br>First author, year <sup>Ref</sup> |
|------|--------------------------------------------------------|------------------------------------------------------------|---------|------------------------------------|-----------------------------|------------------------|-----------------|--------------|----------------------|-----------------------------------------------------|
|      |                                                        |                                                            | (n)     | Incidence (per 100,000 population) |                             |                        |                 | (n)          | Population incidence |                                                     |
| 2001 | State of Pernambuco                                    | Northeast                                                  | 17,112  |                                    |                             |                        | 49              | 1            |                      | Cordeiro 2007 [34]                                  |
| 2001 | City of Itabuna                                        | Northeast                                                  | 458     | 231.5                              |                             |                        |                 |              |                      | De Souza 2010 [40]                                  |
| 2001 | State of São Paulo                                     | Southeast                                                  |         | 137.3                              |                             |                        |                 |              |                      | Gasparetti 2007 [46]                                |
| 2001 | States of Paraná, Santa Catarina and Rio Grande do Sul | South (these three states make up all of the South region) | 1628    |                                    |                             |                        | 33              |              |                      | Koyama 2009 [43]                                    |
| 2001 | City of Goiânia                                        | Central-West                                               | 6709    |                                    | 203                         |                        |                 |              |                      | Feres 2006 [45]                                     |
| 2001 | City of Ribeirão Preto                                 | Southeast                                                  | 3186    | 619.65                             |                             |                        |                 |              |                      | Hino 2010 [47]                                      |
| 2001 | City of São Luís                                       | Northeast                                                  | 601     |                                    |                             |                        |                 |              |                      | Goncalves Neto 2004 [35]                            |
| 2001 | Rio de Janeiro                                         | Southeast                                                  | ~70,000 |                                    |                             |                        |                 |              |                      | Nogueira 2002 [6]                                   |
| 2001 | City of Anapolis                                       | Central-West                                               |         | 31                                 |                             |                        |                 |              |                      | Santos 2009 [50]                                    |
| 2001 | State of Piauí                                         | Northeast                                                  | 10,400  |                                    |                             |                        |                 |              |                      | De Castro 2003 [49]                                 |
| 2002 | City of Vitória                                        | Southeast                                                  | 4324    | 1444.4                             | 4258                        |                        | 11*             | 0            |                      | Cardoso 2011 [42]                                   |
| 2002 | State of Ceará                                         | Northeast                                                  | 16,465  |                                    |                             |                        | 72 <sup>†</sup> |              |                      | Cavalcanti 2011 [39]                                |
| 2002 | State of Pernambuco                                    | Northeast                                                  | 116,245 |                                    |                             |                        | 340             | 20           |                      | Cordeiro 2007 [34]                                  |
| 2002 | City of Itabuna                                        | Northeast                                                  | 1868    | 938.3                              |                             |                        |                 |              |                      | De Souza 2010 [40]                                  |
| 2002 | State of São Paulo                                     | Southeast                                                  |         | 102.62                             |                             |                        |                 |              |                      | Gasparetti 2007 [46]                                |

| Year | Location                                               | Region                                                     | DF      |                                    | Laboratory-confirmed DF (n) | DF hospitalization (n) | DHF (n)          | DF mortality |                      | Source of data<br>First author, year <sup>Ref</sup> |
|------|--------------------------------------------------------|------------------------------------------------------------|---------|------------------------------------|-----------------------------|------------------------|------------------|--------------|----------------------|-----------------------------------------------------|
|      |                                                        |                                                            | (n)     | Incidence (per 100,000 population) |                             |                        |                  | (n)          | Population incidence |                                                     |
| 2002 | States of Paraná, Santa Catarina and Rio Grande do Sul | South (these three states make up all of the South region) | 7318    |                                    |                             |                        | 376              |              |                      | Koyama 2009 [43]                                    |
| 2002 | City of Teresina                                       | Northeast                                                  | 4259    |                                    |                             |                        | 1                |              |                      | Monteiro 2009 [51]                                  |
| 2002 | City of Goiânia                                        | Central-West                                               | 17,632  |                                    | 697                         |                        |                  |              |                      | Feres 2006 [45]                                     |
| 2002 | City of Ribeirão Preto                                 | Southeast                                                  | 347     | 66.66                              |                             |                        |                  |              |                      | Hino 2010 [47]                                      |
| 2002 | City of Recife                                         | Northeast                                                  | 35,597  | 2502                               |                             |                        | 208              | 14           |                      | Montenegro 2006 [44]                                |
| 2002 | City of São Luís                                       | Northeast                                                  | 904     |                                    |                             |                        |                  |              |                      | Goncalves Neto 2004 [35]                            |
| 2002 | Rio de Janeiro                                         | Southeast                                                  | ~65,000 |                                    |                             |                        |                  | 40           |                      | Nogueira 2002 [6]                                   |
| 2002 | City of Salvador                                       | Northeast                                                  |         | 1088.9                             |                             |                        |                  | 9            | 0.35                 | Sampaio 2008 [48]                                   |
| 2002 | City of Anapolis                                       | Central-West                                               | 200     | 61                                 |                             |                        |                  |              |                      | Santos 2009 [50]                                    |
| 2002 | State of Piauí                                         | Northeast                                                  | 10,300  |                                    |                             |                        |                  |              |                      | De Castro 2003 [49]                                 |
| 2003 | City of Vitória                                        | Southeast                                                  | 6358    | 2100.9                             | 6140                        |                        | 11*              | 2            |                      | Cardoso 2011 [42]                                   |
| 2003 | State of Ceará                                         | Northeast                                                  | 23,796  |                                    |                             |                        | 292 <sup>†</sup> |              |                      | Cavalcanti 2011 [39]                                |
| 2003 | State of Pernambuco                                    | Northeast                                                  | 26,083  |                                    |                             |                        | 21               | 3            |                      | Cordeiro 2007 [34]                                  |
| 2003 | City of Itabuna                                        | Northeast                                                  | 5811    | 2902.8                             |                             |                        |                  |              |                      | De Souza 2010 [40]                                  |
| 2003 | State of São Paulo                                     | Southeast                                                  |         | 52.68                              |                             |                        |                  |              |                      | Gasparetti 2007 [46]                                |

| Year | Location                                               | Region                                                     | DF     |                                    | Laboratory-confirmed DF (n) | DF hospitalization (n) | DHF (n)         | DF mortality |                      | Source of data<br>First author, year <sup>Ref</sup> |
|------|--------------------------------------------------------|------------------------------------------------------------|--------|------------------------------------|-----------------------------|------------------------|-----------------|--------------|----------------------|-----------------------------------------------------|
|      |                                                        |                                                            | (n)    | Incidence (per 100,000 population) |                             |                        |                 | (n)          | Population incidence |                                                     |
| 2003 | States of Paraná, Santa Catarina and Rio Grande do Sul | South (these three states make up all of the South region) | 11,050 |                                    |                             |                        | 468             |              |                      | Koyama 2009 [43]                                    |
| 2003 | City of Teresina                                       | Northeast                                                  | 3920   |                                    |                             |                        | 14              |              |                      | Monteiro 2009 [51]                                  |
| 2003 | City of Goiânia                                        | Central-West                                               | 7438   |                                    | 69                          |                        |                 |              |                      | Feres 2006 [45]                                     |
| 2003 | City of Ribeirão Preto                                 | Southeast                                                  | 799    | 151.4                              |                             |                        |                 |              |                      | Hino 2010 [47]                                      |
| 2003 | City of Anapolis                                       | Central-West                                               |        | 9                                  |                             |                        |                 |              |                      | Santos 2009 [50]                                    |
| 2004 | City of Vitória                                        | Southeast                                                  | 502    | 162.2                              | 324                         |                        | 0*              | 0            |                      | Cardoso 2011 [42]                                   |
| 2004 | State of Ceará                                         | Northeast                                                  | 3094   |                                    |                             |                        | 14 <sup>†</sup> |              |                      | Cavalcanti 2011 [39]                                |
| 2004 | State of Pernambuco                                    | Northeast                                                  | 6337   |                                    |                             |                        | 16              |              |                      | Cordeiro 2007 [34]                                  |
| 2004 | City of Itabuna                                        | Northeast                                                  | 118    | 58.62                              |                             |                        |                 |              |                      | De Souza 2010 [40]                                  |
| 2004 | State of São Paulo                                     | Southeast                                                  |        | 7.77                               |                             |                        |                 |              |                      | Gasparetti 2007 [46]                                |
| 2004 | States of Paraná, Santa Catarina and Rio Grande do Sul | South (these three states make up all of the South region) | 44     |                                    |                             |                        | 58              |              |                      | Koyama 2009 [43]                                    |
| 2004 | City of Teresina                                       | Northeast                                                  | 110    |                                    |                             |                        | 0               |              |                      | Monteiro 2009 [51]                                  |
| 2004 | City of Salvador                                       | Northeast                                                  |        | 9.52                               |                             |                        |                 | 0.07         |                      | Sampaio 2008 [48]                                   |
| 2004 | City of Anapolis                                       | Central-West                                               | 5      | 1                                  |                             |                        |                 |              |                      | Santos 2009 [50]                                    |

| Year | Location                                               | Region                                                     | DF     |                                    | Laboratory-confirmed DF (n) | DF hospitalization (n) | DHF (n)          | DF mortality |                      | Source of data<br>First author, year <sup>Ref</sup> |
|------|--------------------------------------------------------|------------------------------------------------------------|--------|------------------------------------|-----------------------------|------------------------|------------------|--------------|----------------------|-----------------------------------------------------|
|      |                                                        |                                                            | (n)    | Incidence (per 100,000 population) |                             |                        |                  | (n)          | Population incidence |                                                     |
| 2005 | City of Vitória                                        | Southeast                                                  | 1235   | 394.2                              | 228                         |                        | 1*               | 0            |                      | Cardoso 2011 [42]                                   |
| 2005 | State of Ceará                                         | Northeast                                                  | 22,817 |                                    |                             |                        | 199 <sup>†</sup> |              |                      | Cavalcanti 2011 [39]                                |
| 2005 | State of Pernambuco                                    | Northeast                                                  | 12,990 |                                    |                             |                        | 21               | 2            |                      | Cordeiro 2007 [34]                                  |
| 2005 | City of Itabuna                                        | Northeast                                                  | 3827   | 1877.7                             |                             |                        |                  |              |                      | De Souza 2010 [40]                                  |
| 2005 | State of São Paulo                                     | Southeast                                                  |        | 13.58                              |                             |                        |                  |              |                      | Gasparetti 2007 [46]                                |
| 2005 | States of Paraná, Santa Catarina and Rio Grande do Sul | South (these three states make up all of the South region) |        |                                    | 379                         |                        | 94               |              |                      | Koyama 2009 [43]                                    |
| 2005 | City of Teresina                                       | Northeast                                                  | 153    |                                    |                             |                        | 7                |              |                      | Monteiro 2009 [51]                                  |
| 2005 | City of Anapolis                                       | Central-West                                               |        | 10                                 |                             |                        |                  |              |                      | Santos 2009 [50]                                    |
| 2005 | City of Goiânia                                        | Central-West                                               | 9531   |                                    |                             | 880/188 <sup>‡</sup>   |                  |              |                      | Da Silva 2009 [41]                                  |
| 2006 | City of Vitória                                        | Southeast                                                  | 2386   | 752.5                              | 704                         |                        | 3*               | 1            |                      | Cardoso 2011 [42]                                   |
| 2006 | State of Ceará                                         | Northeast                                                  | 25,569 |                                    |                             |                        | 173 <sup>†</sup> |              |                      | Cavalcanti 2011 [39]                                |
| 2006 | State of Pernambuco                                    | Northeast                                                  | 18,595 |                                    |                             |                        | 33               | 4            |                      | Cordeiro 2007 [34]                                  |
| 2006 | City of Itabuna                                        | Northeast                                                  | 145    | 70.7                               |                             |                        |                  |              |                      | De Souza 2010 [40]                                  |
| 2006 | City of Teresina                                       | Northeast                                                  | 1372   |                                    |                             |                        | 26               |              |                      | Monteiro 2009 [51]                                  |
| 2006 | City of Anapolis                                       | Central-West                                               |        | 20                                 |                             |                        |                  |              |                      | Santos 2009 [50]                                    |

| Year | Location         | Region       | DF     |                                    | Laboratory-confirmed DF (n) | DF hospitalization (n) | DHF (n)          | DF mortality |                      | Source of data<br>First author, year <sup>Ref</sup> |
|------|------------------|--------------|--------|------------------------------------|-----------------------------|------------------------|------------------|--------------|----------------------|-----------------------------------------------------|
|      |                  |              | (n)    | Incidence (per 100,000 population) |                             |                        |                  | (n)          | Population incidence |                                                     |
| 2006 | City of Goiânia  | Central-West | 11,867 |                                    |                             | 1599/1181 <sup>‡</sup> |                  |              |                      | Da Silva 2009 [41]                                  |
| 2007 | City of Vitória  | Southeast    | 966    | 307.6                              | 218                         |                        | 0*               | 0            |                      | Cardoso 2011 [42]                                   |
| 2007 | State of Ceará   | Northeast    | 25,026 |                                    |                             |                        | 280 <sup>†</sup> |              |                      | Cavalcanti 2011 [39]                                |
| 2007 | City of Itabuna  | Northeast    | 128    | 62.03                              |                             |                        |                  |              |                      | De Souza 2010 [40]                                  |
| 2007 | City of Anápolis | Central-West |        | 50                                 |                             |                        |                  |              |                      | Santos 2009 [50]                                    |
| 2007 | City of Goiânia  | Central-West | 6524   |                                    |                             | 177/586 <sup>‡</sup>   |                  |              |                      | Da Silva 2009 [41]                                  |
| 2008 | City of Vitória  | Southeast    | 3529   | 1110.4                             | 985                         |                        | 26*              | 2            |                      | Cardoso 2011 [42]                                   |
| 2008 | State of Ceará   | Northeast    | 44,508 |                                    |                             |                        | 408 <sup>†</sup> |              |                      | Cavalcanti 2011 [39]                                |
| 2008 | City of Itabuna  | Northeast    | 2459   | 1158.6                             |                             |                        |                  |              |                      | De Souza 2010 [40]                                  |
| 2008 | City of Goiânia  | Central-West | 22,629 |                                    |                             | 450/1441 <sup>‡</sup>  |                  |              |                      | Da Silva 2009 [41]                                  |
| 2009 | City of Vitória  | Southeast    | 7657   | 1554.6                             | 4977                        |                        | 78*              | 6            |                      | Cardoso 2011 [42]                                   |
| 2009 | City of Itabuna  | Northeast    | 15,197 | 7095.6                             |                             |                        |                  |              |                      | De Souza 2010 [40]                                  |

DF, dengue fever; DHF, dengue haemorrhagic fever; DSS, dengue shock syndrome.

\*DHF/DSS/DFC cases.

<sup>†</sup>Incidence rate.

<sup>‡</sup>Solidus separates results from two different reporting systems: SINAN (first) and SIM (second).
